# Supplementary material
Source: HighWire-hosted journal article supplement (https://gut.bmj.com/content/68/3/400)
Supplement: inline-supplementary-material-2 [file inline-supplementary-material-2.pdf]

## **Supplementary Materials and Methods**

### **Passaging of mucosoid cultures**

After 13 days cells could be passaged. Top and bottom of inserts were washed twice with PBS, followed by 30-60 min incubation with 0.05% trypsin/EDTA (Thermo Scientific 25300) on both sides of the filter. Cells were harvested, washed, and reseeded at 200,000 cells per new filter.

### **Antibacterial activity of mucus**

Mucosoid cultures (+W+ R) were either mock infected or infected at MOI 100 with *H. pylori* P12. After 3 days, the mucus layer was collected in microcentrifuge tubes. In parallel, *H. pylori* P12-GFP (kan<sup>R</sup>) were grown on GC agar plates with vancomycin and kanamycin. Bacteria were collected and washed once with PBS, and a suspension containing  $\sim 2 \times 10^7$  CFU/ml was prepared in PBS. Aliquots of 5  $\mu$ l ( $\sim 10^5$  CFU) were mixed with 20  $\mu$ l of fresh mucus collected from ALI cultures. After incubation at 37°C, surviving bacteria were enumerated following culture on GC agar plates with vancomycin. To kill wild type bacteria used for cell infection, GC plates also contained kanamycin. Results are expressed as the percentage of bacteria surviving from the initial input.

### **Transmission electron microscopy**

For fine structural analysis, mucosoid cultures were fixed in 2.5% glutaraldehyde and postfixed with 0.5% osmium-tetroxide, contrasted with uranyl-acetate and tannic acid, dehydrated in a graded ethanol series, and infiltrated in Polybed (Polysciences). Excised pieces of filter were stacked in flat embedding molds with Polybed. After polymerization, specimens were cut at 60 nm and contrasted with lead citrate. Specimens were analyzed in a Leo 906E transmission electron microscope (Zeiss, Oberkochen, DE) equipped with a sidemounted digital camera (Morada, SIS-Olympus, Münster, DE).

### **Test of WNT3A and RSPO1 conditioned media**

The amount of WNT3A and RSPO1 conditioned media added to culture medium was 50% and 25%, respectively. WNT3A and RSPO1 conditioned supernatant was obtained from the producing cell lines LWNT3a and 293T HA Rspo1 Fc 3/3, respectively. To standardize the amount of WNT3A and RSPO1 used both conditioned supernatants were added for 24 h to 239T test cells transfected with a 7TCF/LEF promoter-binding site driving the expression of GFP and seeded on a poly-L-lysine coated 48-well plate. Cells were then fixed for 20 min with PFA 4% and stained with Hoechst. The number of green cells divided by the number of nuclei representing the “activated cells” was determined automatically from images acquired with an automated microscope (Olympus Soft Imaging Solutions).

Different lots of WNT3a conditioned media were used only if 20% to 25% of the conditioned medium diluted in DMEM activated 50% of the test cells. Similarly, lots of RSPO1 were used only if 5% to 10% of 293T HA Rspo1 Fc 3/3 conditioned medium activated 50% of the test cells (5% of LWNT3A conditioned medium was used as a co-activator in the RSPO1 test).

### **Isolation and culture of gastric stromal cells of the *lamina propria* (GSCs)**

A 2x2 cm piece of human gastric antrum was excised directly adjacent to the one used for isolating epithelial glands. The mucosa was placed with the glands facing up and the *lamina propria* gently scraped off with a scalpel, without disturbing the *muscularis mucosa*. The scraped off cells containing epithelium and stroma were incubated in 2.6 mM DDT and 50 mM EDTA in PBS (GIBCO, without calcium and magnesium) for 20 min at 37 °C in a shaking incubator, centrifuged, supernatant removed and cells incubated in 0.05% trypsin for 20 min at 37 °C. Trypsin was inactivated with 10x the volume of ADF/10% fetal calf serum (Biochrom S0115) and cell aggregates left to settle by gravity. The supernatant was centrifuged and resuspended in 4 ml ADF/10% FCS/7.5 µM Y-27632 in one well of a 6-well plate for one week

until colonies of fibroblastic GSCs appeared. GSCs can be propagated indefinitely in ADF/10% FCS by passaging onto fresh plates once cells reach confluence, using digestion with 0.05% trypsin as before.

#### **WNT activation reporter assay.**

239T cells were transfected with a vector containing 7 TCF/LEF binding sites driving the expression of GFP. Cells were seeded on a poly-L-lysine-coated 48-well plate and exposed to different media to test for the presence of WNT activators or inhibitors derived from the gastric stromal cells. The percentage of GFP positive cells was normalized against the total number of nuclei (Olympus Soft Imaging Solutions).

#### **DNA, RNA Isolation and qPCR Analysis**

Filters were excised from the insert and directly transferred to a tube containing 1 ml Trizol (Thermo). After vortexing, samples were incubated for 10 min at RT, vortexed again and frozen at -80 °C for long-term storage. 500 µl chloroform was added to thawed samples before vortexing, incubation for 2 min at RT and centrifugation for 15min at 4 °C. The aqueous phase was mixed with isopropanol, inverted 6 x and incubated for 10 min at RT. The sample was transferred to a Total RNA isolation Kit column (Thermo) and processed according to the manufacturer's instructions. Total RNA was measured using a NanoDrop and reverse transcription carried out using the Tetro cDNA synthesis Kit (Bioline). DNA was extracted using AllPrep DNA/RNA Mini Kit (Qiagen) according to the manufacturer's instructions; Total DNA was measured using a NanoDrop. qPCR (Step One, Applied Biosystem) was performed using the SensiMix™ SYBR® hi-ROX Kit (Bioline, 3-step cycling according to the manufacturer). Primers are listed in Supplementary Table 5.

## **Histology**

Filters were fixed overnight in 4% paraformaldehyde at 4 °C, washed, embedded orthogonally in Histogel (HG-4000-144) inside a casting mould and paraffinized overnight in a Leica TP1020 tissue processor. The paraffin blocks are generated inside a casting mould on a Paraffin console (Microm). 5 µm sections are cut with a paraffin rotation microtome (Microm). For de-waxing and antigen retrieval, sample slides were washed twice with xylene (10 min) followed by a descending series of alcohols (20 sec each), followed by two washes with water and 30 min in target retrieval solution (Dako) at 95 °C, 20 min at room temperature (RT) and 5 min under running water. For whole mount samples, the filters were fixed for 20 min in 4% PFA at 37 °C and washed with PBS. A 10 min cold (-20 °C) methanol shock was used to permeabilize samples. Rehydrated samples (whole mount or sections) were washed twice with PBS and incubated with blocking solution (PBS, 1% bovine serum albumin, 2% FCS) for 1 h followed by primary antibody (in blocking solution) for 90 min at RT. After 3 washes with PBS, samples were incubated with fluorescently labeled secondary antibodies and Draq5 (1:1000; Cell Signaling) for 90 min in the dark at RT. The antibodies are listed in Supplementary Table 4. Samples were washed three times with PBS, mounted in Mowiol and analyzed by confocal microscopy using a Leica TCS SP-8 microscope. Images were processed, analyzed with FIJI and imported into Adobe Illustrator.

## **Protein Lysates and Immunoblot Analysis**

100 µl 2x Laemmli buffer (4% SDS, 20% glycerol, 120 mM Tris-HCl (pH 6.8) and 0.02% bromophenol blue) was added to the filters. Cells were gently scraped with a pipette tip and the lysate transferred to a tube. After addition of 5 µl β-mercapto-ethanol, samples were boiled for 5 min at 95 °C, separated on a 8% SDS-polyacrylamide gel and transferred to a polyvinylidene difluoride membrane by Western blotting. Membranes were blocked with TBS buffer containing 0.1% Tween-20 and 3% BSA for 2 h and incubated with primary antibodies

overnight at 4°C, followed by HRP-conjugated secondary antibodies for 2 h. Membranes were covered with Hyperfilm ECL (Amersham) and signals detected with X-ray films. Antibodies are listed in Supplementary Table 4.

### **Microarray Analysis**

Microarrays were hybridized for mucosoid cultures derived from 3 different patients cultured in +W+R or -W-R medium for 5 days followed by infection for three days in the same condition. Filters with mucosoid cultures were dissolved in 1 ml Trizol (Life Technologies) and RNA isolated as per the manufacturer's protocol. Quantity of RNA was measured using NanoDrop 1000 UV-Vis spectrophotometer (Kisker) and quality was assessed by Agilent 2100 Bioanalyzer with an RNA Nano 6000 microfluidics kit (Agilent Technologies). Microarray experiments were performed as single-color hybridizations on custom whole genome human 8x60k Agilent arrays (Design ID 048908) according to the manufacturer's instructions and Agilent Feature Extraction software used to obtain probe intensities. The extracted single-color raw data files were background corrected, quantile normalized and further analyzed for differential gene expression using R [1] and the associated BioConductor package LIMMA [2]. Microarray gene expression comparisons between groups were performed using paired test between conditions. Microarray data have been deposited in the Gene Expression Omnibus (GEO; [www.ncbi.nlm.nih.gov/geo/](http://www.ncbi.nlm.nih.gov/geo/)) of the National Center for Biotechnology Information and can be accessed with the GEO accession number GSE94032.

### **Mass spectrometry sample preparation**

The mucus samples were prepared according to the FASP method [3] and following the modification published by Rodriguez-Pineiro et al., (2013) [4]. Samples were diluted with 200 µl 6 M guanidinium hydrochloride in 0.1 M Tris/HCl pH 8.5 (GuHCl) according to a previously published protocol and transferred into MRCF0R030 Microcon-30 kDa centrifugal filters. Cysteines were reduced by adding 100 µl 0.1 M dithiothreitol (Sigma-Aldrich D0632) at 60 °C

for 15 min and alkylated with 100  $\mu$ l 0.05 M iodoacetamide (Sigma-Aldrich I6125) at RT for 20 min in the dark. After washing two times with 100  $\mu$ l GuHCl followed by two times 100  $\mu$ l 50 mM ammonium bicarbonate/5% acetonitrile the proteins were digested with 0.2  $\mu$ g sequencing-grade modified trypsin (Promega V5111) in 40  $\mu$ l overnight at 37 °C. After digestion, peptide mixtures were acidified with TFA to 0.5% (vol/vol), desalted using ZipTip C18 (Millipore, 0.6  $\mu$ l bed volume) and then lyophilized

### **LC-MS/MS Analysis**

The peptides were analyzed using a QExactive Plus mass spectrometer (Thermo Fisher Scientific) coupled online to a Dionex UltiMate 3000 RSLC nano system (Thermo Fisher Scientific). After solubilization in 13  $\mu$ l 2:98 (v/v) acetonitrile/water containing 0.1% TFA, 10  $\mu$ l of each sample was loaded on a C18 PepMap 100 trap column (300  $\mu$ m x 5mm; 5  $\mu$ m particle size 100 Å pore size; Thermo Fisher Scientific) at a flow rate of 20  $\mu$ l/min 2:98 (v/v) acetonitrile/water containing 0.1% TFA for pre-concentration and desalting. Separation was performed using an Acclaim C18 PepMap RSLC column (75 $\mu$ m x 250 mm; 2  $\mu$ m particle size 100 Å pore size; Thermo Fisher Scientific) at a flow rate of 300 nl/min. HPLC solvent A was 0.1% (v/v) FA and peptides were eluted from the column using HPLC solvent B 80:20 (v/v) acetonitrile/water containing 0.1% FA starting from 3%, increasing to 40 % in 45 minutes, and to 98% in 5 minutes. The peptides were analyzed in data-dependent acquisition mode that alternated between one MS scan and 10 MS/MS scans for the most abundant precursor ions. MS scans were acquired over a mass range of m/z 350–1600 and resolution was set to 70,000. Peptides were fragmented using HCD at 27 % normalized collision energy and measured in the orbitrap at a resolution of 17500.

### **Protein identification**

Proteins were identified and quantified using the MaxQuant software (Version 1.601) [5] [6] searching against the SwissProt human sequence database (released July 11, 2017, 20214

entries). Searches were performed using the following parameters: max. missed cleavages 2; variable modifications Oxidation (M); Acetyl (Protein N-term); pyro-Glu (Gln) and carbamidomethylation of cysteines as fixed modification. The false discovery rate was set to 0.01 for proteins, peptides and modified sites.

### Supplementary References

1. R Development Core Team. R: a language and environment for statistical computing. URL: <http://www.gbif.org/resource/81287>
2. Ritchie, M.E., B. Phipson, D. Wu, Y. Hu, C.W. Law, W. Shi, and G.K. Smyth (2015). limma powers differential expression analyses for RNA-sequencing and microarray studies. *Nucleic Acids Res* 43, e47.
3. Wisniewski, J.R., A. Zougman, N. Nagaraj, and M. Mann (2009). Universal sample preparation method for proteome analysis. *Nat Methods* 6, 359-62.
4. Rodriguez-Pineiro, A.M., J.H. Bergstrom, A. Ermund, J.K. Gustafsson, A. Schutte, M.E. Johansson, and G.C. Hansson (2013). Studies of mucus in mouse stomach, small intestine, and colon. II. Gastrointestinal mucus proteome reveals Muc2 and Muc5ac accompanied by a set of core proteins. *Am J Physiol Gastrointest Liver Physiol* 305, G348-56.
5. Cox, J. and M. Mann (2008). MaxQuant enables high peptide identification rates, individualized p.p.b.-range mass accuracies and proteome-wide protein quantification. *Nat Biotechnol* 26, 1367-72.
6. Tyanova, S., T. Temu, and J. Cox (2016). The MaxQuant computational platform for mass spectrometry-based shotgun proteomics. *Nat Protoc* 11, 2301-2319.





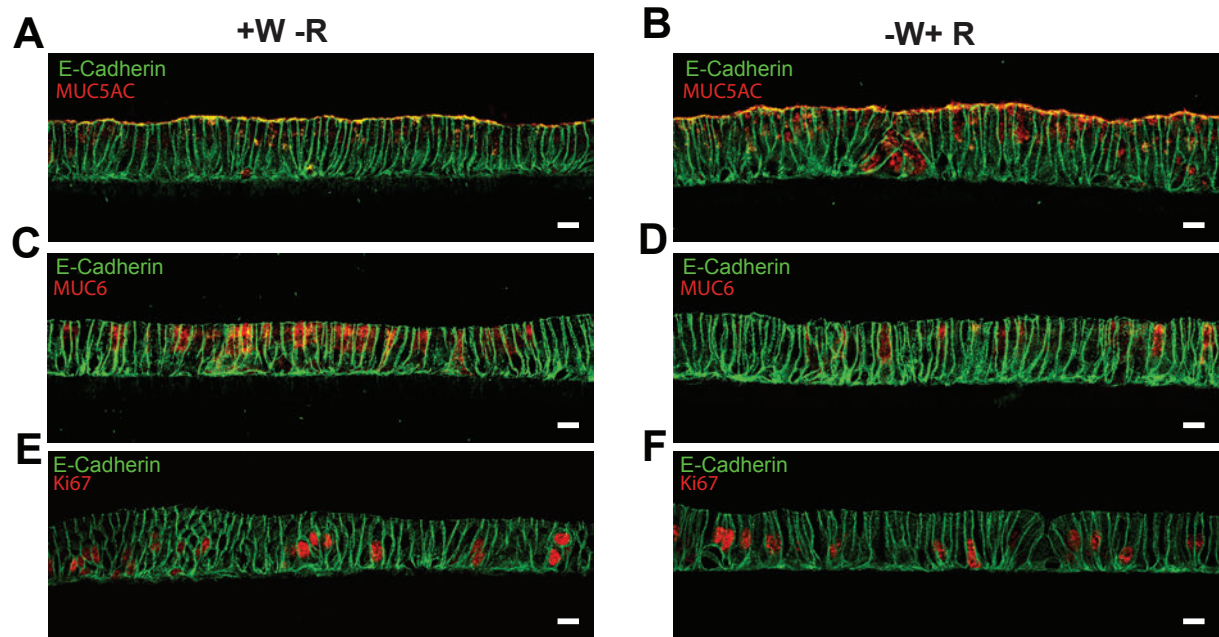

### Supplementary Figure 2

Gastric mucosoid cultures cultured for 6 days in the absence of either RSPO3 or Wnt3A to assess their effect on differentiation via fluorescent labelling with antibodies against (A,B) MUC5AC (C,D) MUC6 or (E,F) Ki67.

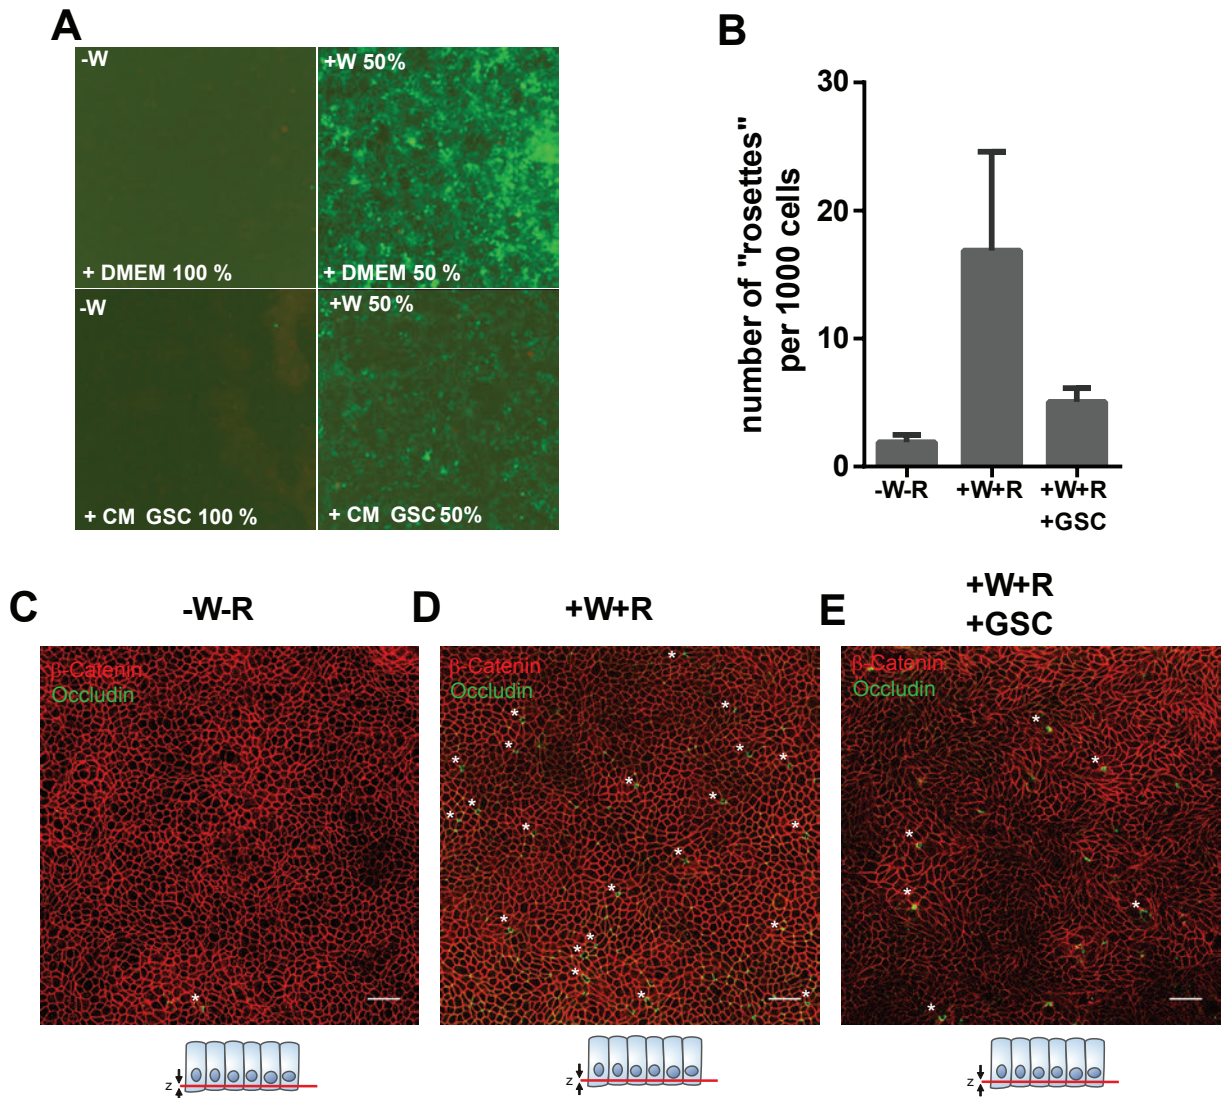

### Supplementary Figure 3

(A) 293T cells transfected with a 7xbinding site for TCF driving GFP expression were used to test Wnt pathway activation via activation of a TCF dependent promoter. Addition of 50% conditioned medium from Wnt3A producing LW3NTA cells strongly activate GFP signal while GSC-conditioned medium reduces it. (B-E) Mucosoid cultures were cultured in +W+R medium and (C) Wnt3A and RSPO1 discontinued for 6 days (D) never discontinued or (E) GSCs were co-cultured in the lower compartment for the same time. Immunofluorescence labelling with antibodies against occludin and  $\beta$ -catenin in whole mount preparations. Images show occludin labelling around which the cells are organized in rosette-like structures (see also Figure 2D). (B) Those structures were counted and normalized for the number of cells in three independent experiments. Scale bars: 30  $\mu$ m

**A**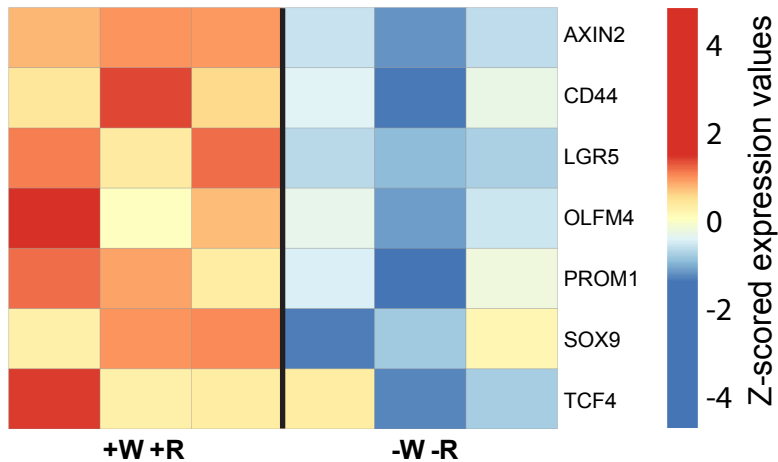**B**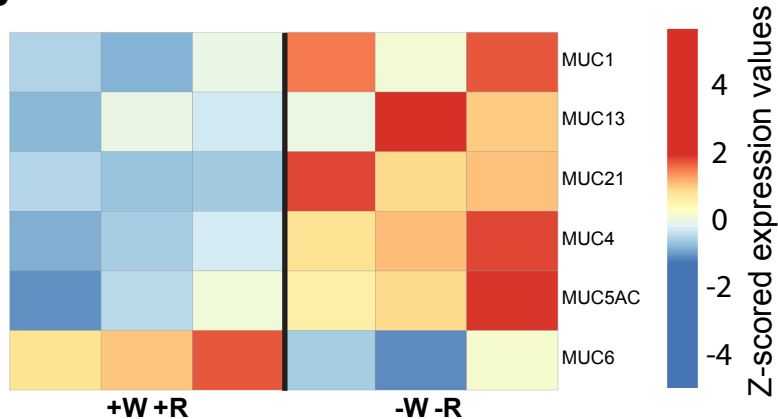**Supplementary Figure 4**

(A) Heatmap of the sample described in Figure 6C showing the Z-scored expression values from the array of stem cell related genes (*LGR5*, *TCF4*, *OLFM4*, *SOX9*, *CD44*, *AXIN2*, *PROM1*) after removing Wnt3A and RSPO1 for 8 days in three independent experiments. (B) Expression of gel-forming and surface-associated mucins detectable in +W+R or -W-R samples.

Supplementary table 1

MaqQuant results of the most abundant proteins in the mucus

| Protein IDs                          | MUC5A    | LYSC     | TRFE     | MUC6     | TFF2     | FCGBP    | TRY2     | TRY1     | NGAL     | LG3BP    | MUC5B    | MUC1     | A1AT     | QSOX1    | EZRI     | RNAS1    | TRFL     | TFF1     | TFF3     | PROM1    | GKN1     |
|--------------------------------------|----------|----------|----------|----------|----------|----------|----------|----------|----------|----------|----------|----------|----------|----------|----------|----------|----------|----------|----------|----------|----------|
| Score                                | 323,3    | 323,3    | 323,3    | 323,3    | 323,3    | 323,3    | 323,3    | 323,3    | 323,3    | 323,3    | 323,3    | 323,3    | 323,3    | 323,3    | 323,3    | 323,3    | 323,3    | 323,3    | 223,6    | 323,3    | 263,9    |
| LFQ intensity GAT24 +WR              | 1,55E+11 | 7,27E+10 | 2,92E+10 | 1,15E+11 | 2,90E+10 | 5,70E+10 | 3,48E+10 | 6,41E+10 | 1,35E+11 | 2,47E+10 | 7,20E+09 | 3,57E+10 | 2,15E+10 | 2,47E+10 | 1,84E+10 | 1,46E+10 | 2,81E+09 | 3,90E+08 | 2,44E+09 | 1,20E+10 | 0,00E+00 |
| LFQ intensity GAT24 -WR              | 3,12E+11 | 7,22E+10 | 1,43E+11 | 2,17E+10 | 1,98E+10 | 1,15E+11 | 6,45E+10 | 7,28E+10 | 4,10E+10 | 4,31E+10 | 6,05E+09 | 3,09E+10 | 7,42E+09 | 7,33E+09 | 3,24E+10 | 6,51E+09 | 5,48E+08 | 5,46E+07 | 1,65E+09 | 3,84E+09 | 2,28E+09 |
| LFQ intensity GAT26 +WR              | 3,64E+11 | 2,69E+11 | 1,53E+10 | 1,56E+11 | 9,74E+10 | 3,31E+10 | 3,89E+10 | 4,29E+10 | 1,95E+10 | 2,81E+10 | 2,41E+10 | 3,53E+09 | 2,60E+10 | 2,36E+10 | 2,59E+09 | 6,22E+09 | 2,84E+08 | 4,57E+09 | 9,75E+09 | 2,69E+09 | 0,00E+00 |
| LFQ intensity GAT26 -WR              | 1,81E+12 | 9,12E+10 | 1,97E+10 | 1,00E+10 | 8,38E+10 | 3,46E+10 | 5,62E+10 | 3,78E+10 | 6,88E+09 | 1,02E+10 | 6,32E+09 | 2,28E+09 | 1,59E+09 | 6,92E+09 | 2,87E+09 | 2,41E+09 | 9,78E+07 | 1,59E+10 | 2,16E+09 | 3,76E+08 | 2,36E+09 |
| LFQ intensity GAT27 +WR              | 5,14E+10 | 2,37E+11 | 2,38E+11 | 1,01E+11 | 7,51E+10 | 1,53E+10 | 1,60E+10 | 1,69E+10 | 3,42E+09 | 1,69E+10 | 1,87E+10 | 1,43E+09 | 4,22E+09 | 4,45E+09 | 1,28E+09 | 8,17E+09 | 4,14E+09 | 1,51E+08 | 9,84E+09 | 8,86E+08 | 0,00E+00 |
| LFQ intensity GAT27 -WR              | 6,68E+11 | 5,43E+10 | 1,46E+11 | 1,59E+10 | 6,46E+10 | 3,99E+10 | 1,49E+10 | 1,58E+10 | 3,66E+09 | 1,18E+10 | 1,40E+10 | 3,77E+09 | 6,61E+08 | 3,78E+09 | 5,16E+09 | 1,72E+09 | 1,76E+08 | 5,32E+09 | 2,21E+09 | 5,41E+08 | 1,04E+09 |
| LFQ intensity GAT28 +WR              | 9,03E+10 | 9,14E+10 | 2,49E+11 | 6,75E+10 | 1,18E+10 | 2,56E+09 | 1,88E+10 | 3,56E+09 | 6,20E+09 | 7,49E+09 | 2,87E+10 | 2,44E+08 | 5,69E+09 | 8,75E+08 | 1,43E+09 | 4,99E+09 | 2,70E+10 | 2,44E+07 | 3,20E+08 | 8,22E+08 | 0,00E+00 |
| LFQ intensity GAT28 -WR              | 8,80E+11 | 1,47E+11 | 5,74E+10 | 4,16E+10 | 7,62E+10 | 2,67E+10 | 4,60E+10 | 2,87E+10 | 1,30E+10 | 9,91E+09 | 1,26E+10 | 2,21E+09 | 1,16E+10 | 5,70E+09 | 3,44E+09 | 3,95E+09 | 5,21E+09 | 6,48E+09 | 5,17E+08 | 4,96E+08 | 1,67E+08 |
| LFQ AVERAGE intensity +WR            | 1,65E+11 | 1,68E+11 | 1,33E+11 | 1,10E+11 | 5,33E+10 | 2,70E+10 | 2,71E+10 | 3,19E+10 | 4,10E+10 | 1,93E+10 | 1,97E+10 | 1,02E+10 | 1,43E+10 | 1,34E+10 | 5,93E+09 | 8,48E+09 | 8,56E+09 | 1,28E+09 | 5,59E+09 | 4,11E+09 | 0,00E+00 |
| LFQ AVERAGE intensity -WR            | 9,17E+11 | 9,12E+10 | 9,15E+10 | 2,23E+10 | 6,11E+10 | 5,41E+10 | 4,54E+10 | 3,88E+10 | 1,61E+10 | 1,87E+10 | 9,74E+09 | 9,78E+09 | 5,31E+09 | 5,93E+09 | 1,10E+10 | 3,65E+09 | 1,51E+09 | 6,93E+09 | 1,64E+09 | 1,31E+09 | 1,46E+09 |
| LFQ AVERAGE intensity                | 5,41E+11 | 1,29E+11 | 1,12E+11 | 6,61E+10 | 5,72E+10 | 4,05E+10 | 3,62E+10 | 3,53E+10 | 2,86E+10 | 1,90E+10 | 1,47E+10 | 1,00E+10 | 9,83E+09 | 9,68E+09 | 8,45E+09 | 6,07E+09 | 5,04E+09 | 4,11E+09 | 3,61E+09 | 2,71E+09 | 7,31E+08 |
| Log2 LFQ AVERAGE fold change +WR/-WR | -2,47    | 0,88     | 0,54     | 2,30     | -0,20    | -1,00    | -0,74    | -0,28    | 1,35     | 0,04     | 1,01     | 0,06     | 1,44     | 1,18     | -0,89    | 1,22     | 2,50     | -2,43    | 1,77     | 1,65     | #NUM!    |

| Protein IDs                       | MUC5A    | LYSC     | TRFE     | MUC6     | TFF2     | FCGBP    | TRY2     | TRY1     | NGAL     | LG3BP    | MUC5B    | MUC1     | A1AT     | QSOX1    | EZRI     | RNAS1    | TRFL     | TFF1     | TFF3     | PROM1    | GKN1     |
|-----------------------------------|----------|----------|----------|----------|----------|----------|----------|----------|----------|----------|----------|----------|----------|----------|----------|----------|----------|----------|----------|----------|----------|
| Razor + unique peptides GAT24 +WR | 129      | 26       | 61       | 55       | 9        | 117      | 9        | 17       | 25       | 27       | 49       | 10       | 36       | 37       | 50       | 6        | 34       | 4        | 3        | 35       | 0        |
| Razor + unique peptides GAT24 -WR | 134      | 16       | 71       | 18       | 10       | 131      | 10       | 15       | 22       | 22       | 31       | 10       | 34       | 32       | 61       | 5        | 27       | 4        | 3        | 30       | 5        |
| Razor + unique peptides GAT26 +WR | 194      | 31       | 68       | 79       | 13       | 118      | 12       | 21       | 24       | 40       | 81       | 9        | 49       | 54       | 39       | 11       | 2        | 6        | 8        | 25       | 0        |
| Razor + unique peptides GAT26 -WR | 234      | 25       | 55       | 43       | 14       | 111      | 10       | 18       | 18       | 37       | 62       | 7        | 18       | 40       | 32       | 14       | 3        | 6        | 7        | 11       | 13       |
| Razor + unique peptides GAT27 +WR | 72       | 23       | 93       | 55       | 13       | 48       | 8        | 13       | 10       | 24       | 50       | 4        | 18       | 20       | 14       | 9        | 4        | 5        | 7        | 6        | 0        |
| Razor + unique peptides GAT27 -WR | 181      | 23       | 89       | 41       | 14       | 88       | 7        | 12       | 13       | 21       | 55       | 5        | 7        | 21       | 33       | 9        | 3        | 6        | 5        | 8        | 10       |
| Razor + unique peptides GAT28 +WR | 98       | 23       | 85       | 49       | 10       | 20       | 4        | 7        | 11       | 14       | 57       | 5        | 19       | 8        | 10       | 11       | 38       | 3        | 3        | 6        | 0        |
| Razor + unique peptides GAT28 -WR | 210      | 26       | 74       | 53       | 14       | 87       | 9        | 17       | 18       | 22       | 65       | 5        | 30       | 28       | 26       | 14       | 30       | 5        | 3        | 9        | 2        |
| Unique peptides GAT24 +WR         | 122      | 26       | 61       | 55       | 9        | 117      | 6        | 14       | 25       | 27       | 49       | 10       | 36       | 37       | 36       | 6        | 34       | 4        | 3        | 35       | 0        |
| Unique peptides GAT24 -WR         | 127      | 16       | 71       | 18       | 10       | 131      | 7        | 13       | 22       | 22       | 31       | 10       | 34       | 32       | 45       | 5        | 27       | 4        | 3        | 30       | 5        |
| Unique peptides GAT26 +WR         | 187      | 31       | 68       | 79       | 13       | 118      | 8        | 17       | 24       | 40       | 81       | 9        | 49       | 54       | 30       | 11       | 2        | 6        | 8        | 25       | 0        |
| Unique peptides GAT26 -WR         | 227      | 25       | 55       | 43       | 14       | 111      | 7        | 15       | 18       | 37       | 62       | 7        | 18       | 40       | 25       | 14       | 3        | 6        | 7        | 11       | 13       |
| Unique peptides GAT27 +WR         | 69       | 23       | 93       | 55       | 13       | 48       | 5        | 11       | 10       | 24       | 50       | 4        | 18       | 20       | 9        | 9        | 4        | 5        | 7        | 6        | 0        |
| Unique peptides GAT27 -WR         | 175      | 23       | 89       | 41       | 14       | 88       | 4        | 11       | 13       | 21       | 55       | 5        | 7        | 21       | 26       | 9        | 3        | 6        | 5        | 8        | 10       |
| Unique peptides GAT28 +WR         | 93       | 23       | 85       | 49       | 10       | 20       | 2        | 6        | 11       | 14       | 57       | 5        | 19       | 8        | 8        | 11       | 38       | 3        | 3        | 6        | 0        |
| Unique peptides GAT28 -WR         | 204      | 26       | 74       | 53       | 14       | 87       | 5        | 14       | 18       | 22       | 65       | 5        | 30       | 28       | 19       | 14       | 30       | 5        | 3        | 9        | 2        |
| Sequence coverage GAT24 +WR [%]   | 33,3     | 84,5     | 68,1     | 27,4     | 69,8     | 44,8     | 49,8     | 66,8     | 81,8     | 49,4     | 12,4     | 8,9      | 60,8     | 48,3     | 62,5     | 59       | 53,8     | 57,1     | 38,8     | 42,1     | 0        |
| Sequence coverage GAT24 -WR [%]   | 34,5     | 68,9     | 78,1     | 10,3     | 69,8     | 47,9     | 48,2     | 65,2     | 77,3     | 46,2     | 10,2     | 8,9      | 59,8     | 43,4     | 76,3     | 43,6     | 46,6     | 57,1     | 38,8     | 35,7     | 20,1     |
| Sequence coverage GAT26 +WR [%]   | 38,6     | 87,2     | 77,7     | 29,8     | 69,8     | 41       | 49,8     | 60,3     | 81,8     | 59,7     | 18,9     | 8        | 73,2     | 56,1     | 58,2     | 71,8     | 3        | 57,1     | 53,8     | 32,6     | 0        |
| Sequence coverage GAT26 -WR [%]   | 41,3     | 81,1     | 65,9     | 18,7     | 69,8     | 34,8     | 49,8     | 60,3     | 76,3     | 60,2     | 16,2     | 6,1      | 31,1     | 50,6     | 54,6     | 73,7     | 5,1      | 57,1     | 53,8     | 17,8     | 34,7     |
| Sequence coverage GAT27 +WR [%]   | 23,5     | 81,1     | 83       | 22,6     | 69,8     | 16,3     | 37,7     | 51       | 49,5     | 49,9     | 14,8     | 2,9      | 37,1     | 31,6     | 26,6     | 70,5     | 6,6      | 57,1     | 53,8     | 9        | 0        |
| Sequence coverage GAT27 -WR [%]   | 36,1     | 81,1     | 83       | 19,4     | 69,8     | 30,5     | 26,7     | 49,4     | 66,7     | 46,2     | 16,2     | 2,9      | 18,7     | 33,3     | 58,2     | 70,5     | 4,5      | 57,1     | 53,8     | 14,7     | 34,7     |
| Sequence coverage GAT28 +WR [%]   | 25,3     | 84,5     | 83       | 20,9     | 64,3     | 6,4      | 25,1     | 42,9     | 57,6     | 37,4     | 15,4     | 2,9      | 36,8     | 10,8     | 18,8     | 70,5     | 55,6     | 54,8     | 45       | 10,2     | 0        |
| Sequence coverage GAT28 -WR [%]   | 37,8     | 84,5     | 80,5     | 21,5     | 69,8     | 26,3     | 31,6     | 51       | 76,3     | 50,8     | 16,9     | 4,8      | 54,1     | 36,5     | 45,1     | 73,7     | 49,3     | 57,1     | 45       | 15,1     | 10,6     |
| Intensity                         | 4,74E+12 | 1,28E+12 | 7,20E+11 | 5,85E+11 | 5,21E+11 | 3,59E+11 | 3,46E+11 | 3,24E+11 | 2,49E+11 | 1,80E+11 | 1,17E+11 | 9,76E+10 | 9,99E+10 | 9,82E+10 | 7,30E+10 | 5,18E+10 | 2,73E+10 | 4,05E+10 | 3,66E+10 | 2,33E+10 | 6,46E+09 |
| Intensity GAT24 +WR               | 1,63E+11 | 4,35E+11 | 1,53E+10 | 1,09E+11 | 2,83E+10 | 5,77E+10 | 4,83E+10 | 7,89E+10 | 1,49E+11 | 7,22E+10 | 5,95E+09 | 3,73E+10 | 2,48E+10 | 2,63E+10 | 1,74E+10 | 1,60E+10 | 2,97E+09 | 8,22E+08 | 1,96E+09 | 1,28E+10 | 0,00E+00 |
| Intensity GAT24 -WR               | 4,43E+11 | 8,60E+10 | 1,32E+11 | 1,89E+10 | 3,85E+10 | 1,31E+11 | 9,39E+10 | 8,57E+10 | 4,61E+10 | 5,23E+10 | 3,48E+09 | 3,91E+10 | 8,29E+09 | 6,13E+09 | 4,03E+10 | 4,29E+09 | 7,91E+08 | 2,24E+08 | 1,22E+09 | 4,40E+09 | 2,79E+09 |
| Intensity GAT26 +WR               | 6,61E+11 | 4,21E+11 | 1,93E+10 | 2,61E+11 | 1,79E+11 | 5,48E+10 | 1,05E+11 | 7,49E+10 | 2,98E+10 | 3,73E+10 | 4,68E+10 | 1,21E+10 | 4,96E+10 | 4,56E+10 | 4,85E+09 | 1,48E+10 | 7,23E+08 | 9,06E+09 | 2,17E+10 | 4,18E+09 | 0,00E+00 |
| Intensity GAT26 -WR               | 1,97E+12 | 7,13E+10 | 1,74E+10 | 9,68E+09 | 9,20E+10 | 4,30E+10 | 4,17E+10 | 3,61E+10 | 5,97E+09 | 6,51E+09 | 7,36E+09 | 1,90E+09 | 1,41E+09 | 8,10E+09 | 2,66E+09 | 3,55E+09 | 1,06E+08 | 1,50E+10 | 2,58E+09 | 3,63E+08 | 2,55E+09 |
| Intensity GAT27 +WR               | 2,11E+10 | 1,13E+11 | 1,83E+11 | 8,86E+10 | 4,48E+10 | 8,42E+09 | 1,37E+10 | 1,02E+10 | 1,96E+09 | 4,14E+09 | 1,32E+10 | 1,87E+09 | 2,27E+09 | 3,08E+09 | 5,74E+08 | 4,48E+09 | 3,83E+09 | 2,74E+08 | 6,63E+09 | 4,78E+08 | 0,00E+00 |
| Intensity GAT27 -WR               | 5,59E+11 | 3,35E+10 | 1,34E+11 | 1,31E+10 | 5,73E+10 | 3,58E+10 | 1,27E+10 | 1,37E+10 | 2,42E+09 | 3,40E+09 | 1,30E+10 | 3,79E+09 | 3,44E+08 | 3,53E+09 | 3,93E+09 | 1,57E+09 | 2,26E+08 | 6,09E+09 | 2,08E+09 | 3,64E+08 | 1,08E+09 |
| Intensity GAT28 +WR               | 3,44E+10 | 3,38E+10 | 1,57E+11 | 4,13E+10 | 5,96E+09 | 1,20E+09 | 4,79E+09 | 1,50E+09 | 1,12E+09 | 1,35E+09 | 1,58E+10 | 9,18E+07 | 3,06E+09 | 4,21E+08 | 3,90E+08 | 3,49E+09 | 1,45E+10 | 1,65E+07 | 1,22E+08 | 3,30E+08 | 0,00E+00 |
| Intensity GAT28 -WR               | 8,87E+11 | 8,30E+10 | 6,07E+10 | 4,31E+10 | 7,50E+10 | 2,72E+10 | 2,62E+10 | 2,26E+10 | 1,18E+10 | 2,75E+09 | 1,18E+10 | 1,37E+09 | 1,02E+10 | 5,09E+09 | 2,80E+09 | 3,60E+09 | 4,18E+09 | 9,03E+09 | 3,23E+08 | 3,61E+08 | 4,43E+07 |

**Supplementary Table 2**

## Patients

| Code  | Date of isolation | Age | Gender | Comments                                                                            |
|-------|-------------------|-----|--------|-------------------------------------------------------------------------------------|
| GAT11 | 2014-11-12        | 31  | Female | BMI: 68, <i>H.pylori</i> negative                                                   |
| GAT15 | 2015-05-06        | 47  | Male   | BMI: 52, <i>H.pylori</i> negative, diabetes                                         |
| GAT16 | 2015-07-14        | 34  | Male   | BMI: 56, <i>H.pylori</i> negative                                                   |
| GAT18 | 2015-11-11        | 50  | Female | BMI: 43, <i>H.pylori</i> negative                                                   |
| GAT19 | 2015-11-18        | 57  | Male   | BMI: 48, <i>H.pylori</i> negative, bladder cancer, no chemotherapy, no radiotherapy |
| GAT20 | 2015-01-15        | 45  | Female | BMI: 45, <i>H.pylori</i> negative                                                   |
| GAT23 | 2016-04-15        | 55  | Female | BMI: 45, <i>H.pylori</i> negative                                                   |
| GAT24 | 2016-09-30        | 47  | Male   | BMI: 36, <i>H.pylori</i> negative                                                   |
| GAT26 | 2017-02-17        | 69  | Female | BMI: 50, <i>H.pylori</i> negative                                                   |
| GAT27 | 2017-05-10        | 36  | Female | BMI: 69, <i>H.pylori</i> negative, type 2 diabetes                                  |
| GAT28 | 2017-05-16        | 32  | Male   | BMI: 43, <i>H.pylori</i> negative                                                   |
| GAT29 | 2017-05-16        | 43  | Female | BMI: 48, <i>H.pylori</i> negative                                                   |

**Supplementary Table 3**

## Medium Composition

| Name                                                | Concentration | Manufacturer   | Code         |
|-----------------------------------------------------|---------------|----------------|--------------|
| ADF                                                 | 18.45% V/V    | Thermo Fischer | 12634        |
| conditioned Wnt3A-medium (as in Willert et al), 25% | 50% V/V       |                |              |
| conditioned R-spondin1 medium                       | 25% V/V       |                |              |
| 4-(2-hydroxyethyl)-1-piperazineethanesulfonic acid  | 10 mM         | Thermo Fischer | 15630-056    |
| glutamax                                            | 1% V/V        | Thermo Fischer | 35050-087    |
| B27                                                 | 2% V/V        | Thermo Fischer | 17504044     |
| N2                                                  | 1% V/V        | Thermo Fischer | 17502048     |
| human epidermal growth factor (EGF)                 | 20 ng/ml      | Thermo Fischer | PHG0311      |
| human noggin (Peprotech)                            | 150 ng/ml     | Peprotech      | 120-10C-1000 |
| human fibroblast growth factor (FGF)-10             | 150 ng /ml    | Peprotech      | 100-26-1000  |
| nicotinamide                                        | 10 mM         | Sigma          | N0636        |
| human gastrin                                       | 10 nM         | Sigma          | G9145        |
| A83-01                                              | 1 $\mu$ M     | Calbiochem     | 616454       |
| Y-27632*                                            | 7.5 $\mu$ M   | Sigma          | Y0503        |

\*reduced to 1.5  $\mu$ M after 3rd day

**Supplementary Table 4****Histology**

---

| Antibody         | Dilution | Manufacturer   | Code     |
|------------------|----------|----------------|----------|
| Occludin         | 1:200    | Invitrogen     | 331500   |
| Pepsinogen II    | 1:100    | Abcam          | ab9013   |
| CagA-b300        | 1:200    | SCBT           | sc-25760 |
| E-Cadherin       | 1:100    | BD Bioscience  | 610181   |
| Ki67             | 1:100    | Cell Signaling | 9027     |
| MUC6             | 1:100    | Abcam          | ab49462  |
| Cromogranin A    | 1:100    | Abcam          | ab15160  |
| MUC5AC           | 1:100    | Abcam          | ab3649   |
| $\beta$ -Catenin | 1:100    | Sigma-Aldrich  | C2206    |

**Western Blot**

---

| Antibody       | Dilution | Manufacturer | Code     |
|----------------|----------|--------------|----------|
| CagA-b300      | 1:200    | SCBT         | sc-25760 |
| pTyr PY99      | 1:500    | SCBT         | sc-7020  |
| $\beta$ -actin | 1:5000   | Sigma        | A5441    |



## Supplementary Table 5

### Primers

|                |                         |
|----------------|-------------------------|
| CXCL1-3        | Sequence (5' -> 3')     |
| Forward Primer | CGCCCAAACCGAAGTCATAG    |
| Reverse Primer | GCTCCCCTGTTCAGTATCTTT   |
| CCL20          | Sequence (5' -> 3')     |
| Forward Primer | TGCTGTACCAAGAGTTTGCTC   |
| Reverse Primer | CGCACACAGACAACCTTTTCTTT |
| LTB            | Sequence (5' -> 3')     |
| Forward Primer | GTACGGGCCTCTCTGGTACA    |
| Reverse Primer | GTCCACCATATCGGGGTGAC    |
| IL23A          | Sequence (5' -> 3')     |
| Forward Primer | CTCAGGGACAACAGTCAGTTC   |
| Reverse Primer | ACAGGGCTATCAGGGAGCA     |
| KRT19          | Sequence (5' -> 3')     |
| Forward Primer | GTCACAGCTGAGCATGAAAGC   |
| Reverse Primer | AGCTGGGCTTCAATACCGC     |
| KRT18          | Sequence (5' -> 3')     |
| Forward Primer | TTCTGGGGGCATGAGCTTCAC   |
| Reverse Primer | GCGCTGCATAGACGCTG       |
| KRT8           | Sequence (5' -> 3')     |
| Forward Primer | GCTGGCCGTAAACTGCTTTG    |
| Reverse Primer | ACATTTGGCAGCCAGCTTTG    |
| EPCAM          | Sequence (5' -> 3')     |
| Forward Primer | GCTGGCCGTAAACTGCTTTG    |
| Reverse Primer | ACATTTGGCAGCCAGCTTTG    |
| CDH1           | Sequence (5' -> 3')     |
| Forward Primer | TACCCTGGTGGTTCAAGCTG    |
| Reverse Primer | CCTGACCTTGTACGTGGTG     |
| LGR5           | Sequence (5' -> 3')     |
| Forward Primer | CTCCCAGGTCTGGTGTGTTG    |
| Reverse Primer | GCTCGCAATGACAGTGTGTG    |
| CTNNB          | Sequence (5' -> 3')     |
| Forward Primer | AGCAATTTGTGGAGGGGGTC    |
| Reverse Primer | AGCAGCTGCACAAACAATGG    |
| CD44           | Sequence (5' -> 3')     |
| Forward Primer | AGCACCATTTCACACACACC    |
| Reverse Primer | GCACTGGTGCCATTTCTGTC    |
| PGC            | Sequence (5' -> 3')     |
| Forward Primer | TGTCTTTGGGGGTGTGGATAG   |
| Reverse Primer | ATGAGGAACCTTCAATGCCAATC |
| MUC6           | Sequence (5' -> 3')     |
| Forward Primer | CAGCTCAACAAGGTGTGTGC    |
| Reverse Primer | TGGGGAAAGGTCTCCTCGTA    |
| MUC5AC         | Sequence (5' -> 3')     |
| Forward Primer | GGAGGTGCCCACTTCTCAAC    |
| Reverse Primer | CTTCAGGCAGGTCTCGCTG     |
| CHGA           | Sequence (5' -> 3')     |
| Forward Primer | CCAAGGAGAGGGCACATCAG    |
| Reverse Primer | TCTTCCACCGCTCTTTCAG     |
| ATP4b          | Sequence (5' -> 3')     |
| Forward Primer | TGGGTGTGGATCAGCCTGTA    |
| Reverse Primer | CTGGTCTTGGTAGTCCGGTG    |
| IL-8           | Sequence (5' -> 3')     |
| Forward Primer | AACTGCGCCAAACACAGAAAT   |
| Reverse Primer | ATTGCATCTGGCAACCTACA    |
| TNF            | Sequence (5' -> 3')     |
| Forward Primer | TCCCCAGGGACCTCTCTCTA    |
| Reverse Primer | GAGGGTTTGCTACAACATGGG   |

|                   |                                 |
|-------------------|---------------------------------|
| sFRP1             | Sequence (5' -> 3')             |
| Forward Primer    | ACGTGGGCTACAAGAAGATGG           |
| Reverse Primer    | CAGCGACACGGGTAGATGG             |
| sFRP2             | Sequence (5' -> 3')             |
| Forward Primer 1  | ACGTGGGCTACAAGAAGATGG           |
| Reverse Primer 1  | CAGCGACACGGGTAGATGG             |
| sFRP2             | Sequence (5' -> 3')             |
| Forward Primer 2  | CTGGCCCGACATGCTTGAG             |
| Reverse Primer 2  | GCTTCACATACCTTTGGAGCTT          |
| sFRP3             | Sequence (5' -> 3')             |
| Forward Primer 2  | ACACAGACTTACAGGGCTTGAT          |
| Reverse Primer 2  | GAGCCCATACTCATCAAGTACCG         |
| sFRP4             | Sequence (5' -> 3')             |
| Forward Primer    | CCTGGAACATCACGCGGAT             |
| Reverse Primer    | CGGCTTGATAGGGTCGTGC             |
| sFRP5             | Sequence (5' -> 3')             |
| Forward Primer    | AGGAGTACGACTACTATGGCTG          |
| Reverse Primer    | GGTCGGCAGGGATGTCAAG             |
| DKK1              | Sequence (5' -> 3')             |
| Forward Primer    | CCTTGAACCTCGGTTCTCAATTCC        |
| Reverse Primer    | CAATGGTCTGGTACTTATCCCG          |
| DKK2              | Sequence (5' -> 3')             |
| Forward Primer    | CTCACAGATCGGCAGTTCTG            |
| Reverse Primer    | ATGCCAGTCCTTGGTACATGC           |
| DKK3              | Sequence (5' -> 3')             |
| Forward Primer 1  | AGGACACGCAGCACAAATTG            |
| Reverse Primer 1  | CCAGTCTGGTTGTTGGTTATCTT         |
| DKK3              | Sequence (5' -> 3')             |
| Forward Primer 2  | ACGAGTGCATCATCGACGAG            |
| Reverse Primer 2  | GCAGTCCCTCTGGTTGTAC             |
| DKK4              | Sequence (5' -> 3')             |
| Forward Primer    | ACGGACTGCAATACCAGAAAG           |
| Reverse Primer    | CGTTCACACAGAGTGTCCAG            |
| DKKL1             | Sequence (5' -> 3')             |
| Forward Primer    | CTCTACCCTGGTGATCCCCTC           |
| Reverse Primer    | CGAAGCAGGTTACCTTTCAGGA          |
| USAG1             | Sequence (5' -> 3')             |
| Forward Primer    | GCCATCAGAGATGTATTTGGTGG         |
| Reverse Primer    | GTGCTCCCTAACTGGATTGGA           |
| WIF1              | Sequence (5' -> 3')             |
| Forward Primer    | TCTCCAAACACCTCAAAATGCT          |
| Reverse Primer    | GACACTCGCAGATGCGTCT             |
| BARX1             | Sequence (5' -> 3')             |
| Forward Primer    | TTCCACGCCGGACAGAATAGA           |
| Reverse Primer    | AGTAAGCTGCTCGCTCGTTG            |
| TFF2              | Sequence (5' -> 3')             |
| Forward Primer    | CGGGGAGTGAGAAACCTC              |
| Reverse Primer    | CACTGGAGTCGAAACAGCATC           |
| GAPDH             | Sequence (5' -> 3')             |
| Forward Primer    | GGTATCGTGAAGGACTCATGAC          |
| Reverse Primer    | ATGCCAGTGAGCTTCCCGTTTCA         |
| rDNA 16s H.pylori | Sequence (5' -> 3')             |
| Forward Primer    | TTTGTTAGAGAAGATAATGACGGTATCTAAC |
| Reverse Primer    | CATAGGATTTACACCTGACTGACTAT C    |
| gDNA hGAPDH       | Sequence (5' -> 3')             |
| Forward Primer    | GACTTCAACAGCGACACC C            |
| Reverse Primer    | AGAAGATGAAAAGAGTTGTCAAGGGC      |
